# Supplementary material for: Inhibition of mutant IDH1 decreases D-2-HG levels without affecting tumorigenic properties of chondrosarcoma cell lines
Source: PubMed Central journal article supplement (PMC4494954; doi:10.18632/oncotarget.3723), 2015-03-30
Supplement: oncotarget-06-12505-s001.pdf [file oncotarget-06-12505-s001.pdf]

# Inhibition of mutant IDH1 decreases D-2-HG levels without affecting tumorigenic properties of chondrosarcoma cell lines

## Supplementary Material

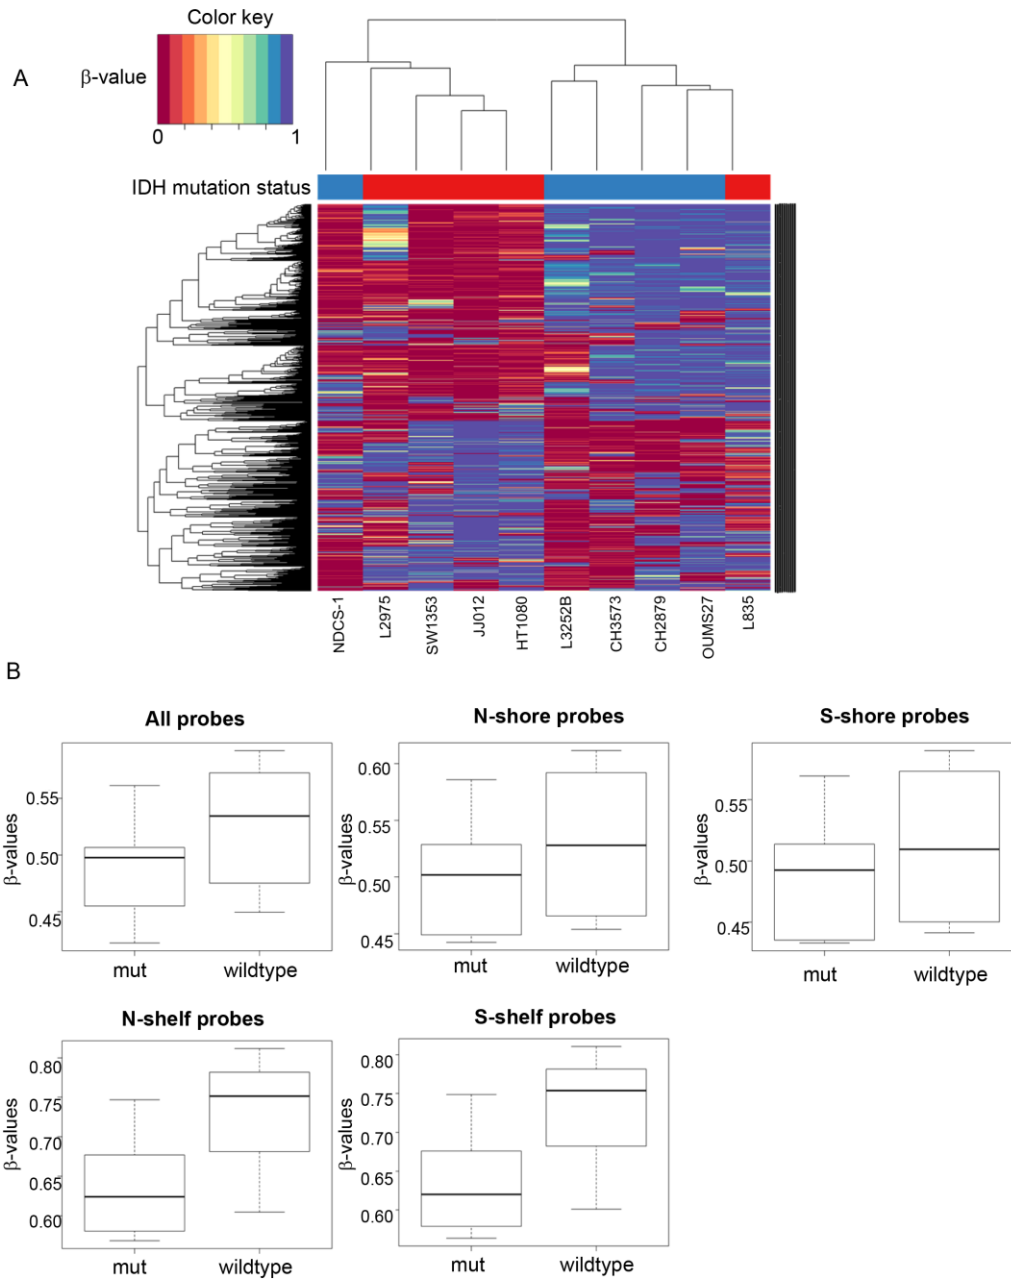

**Supplementary figure 1: Comparison of methylome between IDH1/2 wildtype and mutant IDH1/2 chondrosarcoma cell lines.**

A) Unsupervised hierarchical clustering for the top 2000 most differentially methylated CpG sites resulted in a wildtype (blue samples) and a mutation cluster (red samples). Interestingly, inclusion of all available probes resulted in more methylation in the IDH1/2 wildtype cell lines compared to the mutant IDH1/2 cell lines. B) Interestingly, methylation levels of all probes, probes in the shores and shelves were higher in the wildtype IDH1/2 cell lines compared to the mutant counterparts.

# CH2879

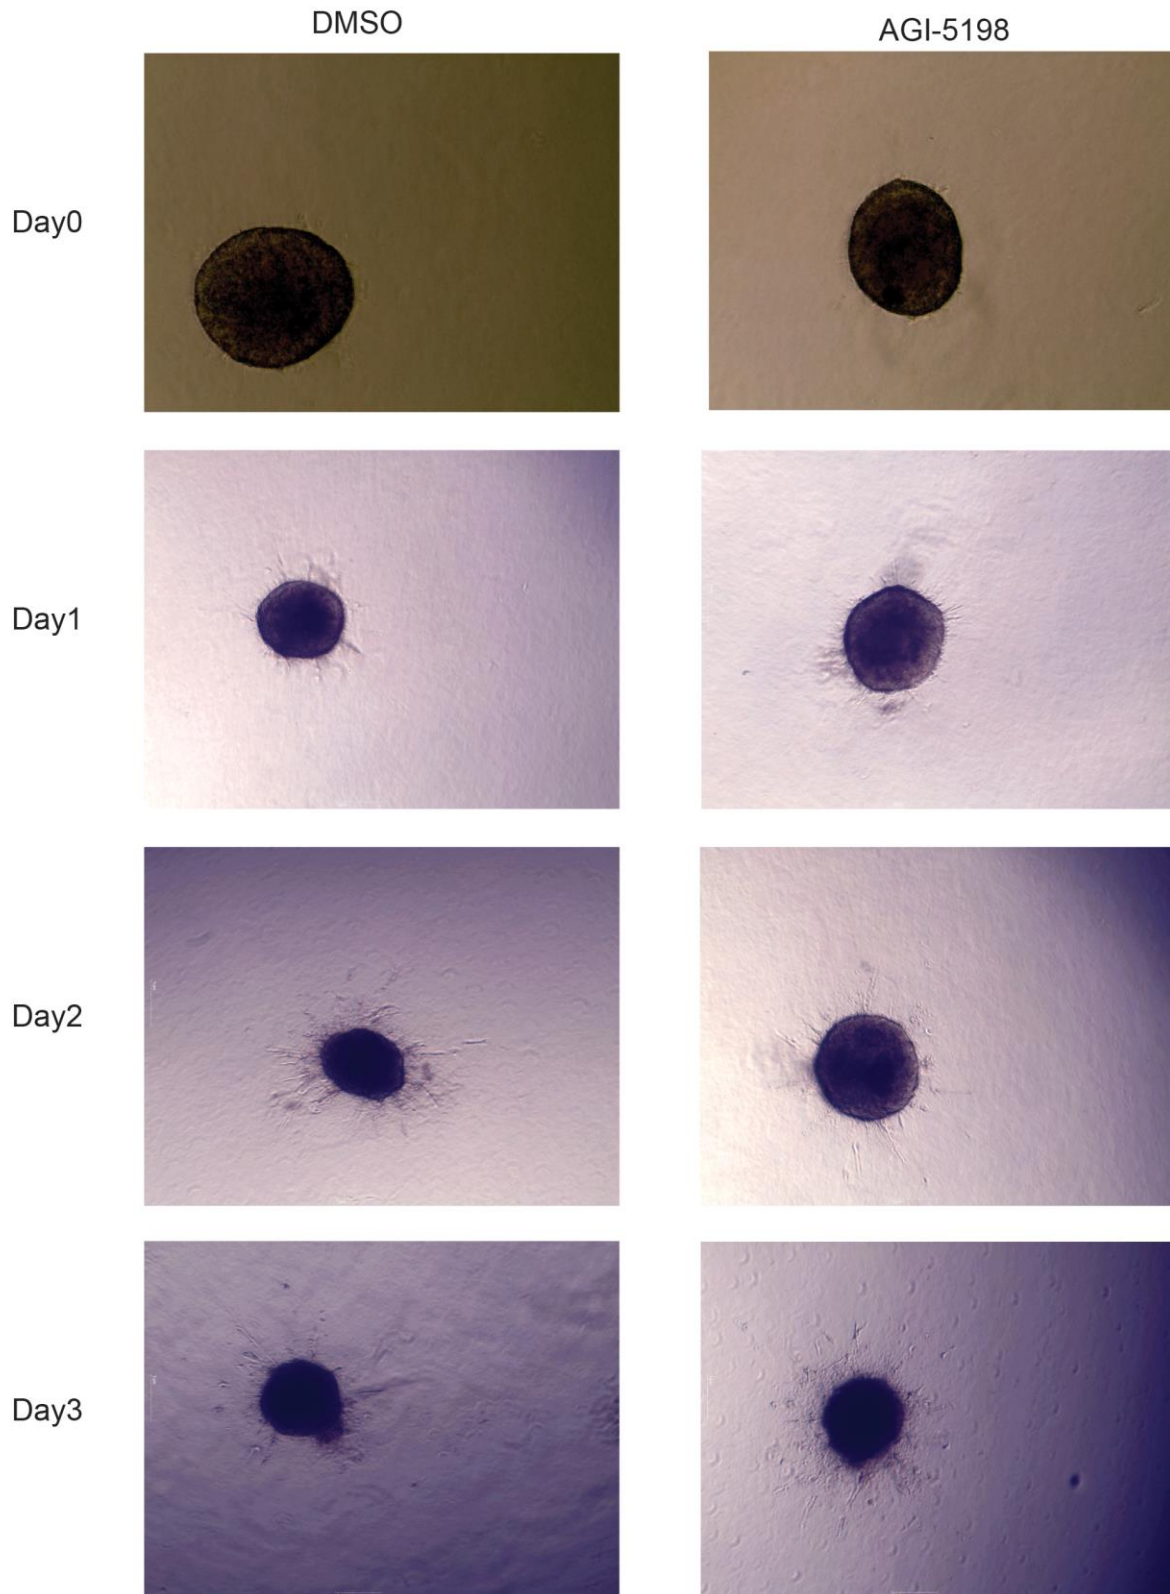

**Supplementary figure 2: Effects of AGI-5198 treatment on migration in a 3D assay.**

No differences in the ability to migrate in a 3D assay were observed between the IDH1/2 wildtype cell line CH2879, the mutant IDH1 cell lines JJ012 and HT1080 and the mutant IDH2 cell line SW1353. Furthermore, treatment with 10  $\mu$ M AGI-5198 did not affect the ability of all cell lines to migrate. Pictures were taken one hour, one day, two days and three days after injection of cells into the matrix.

# JJ012

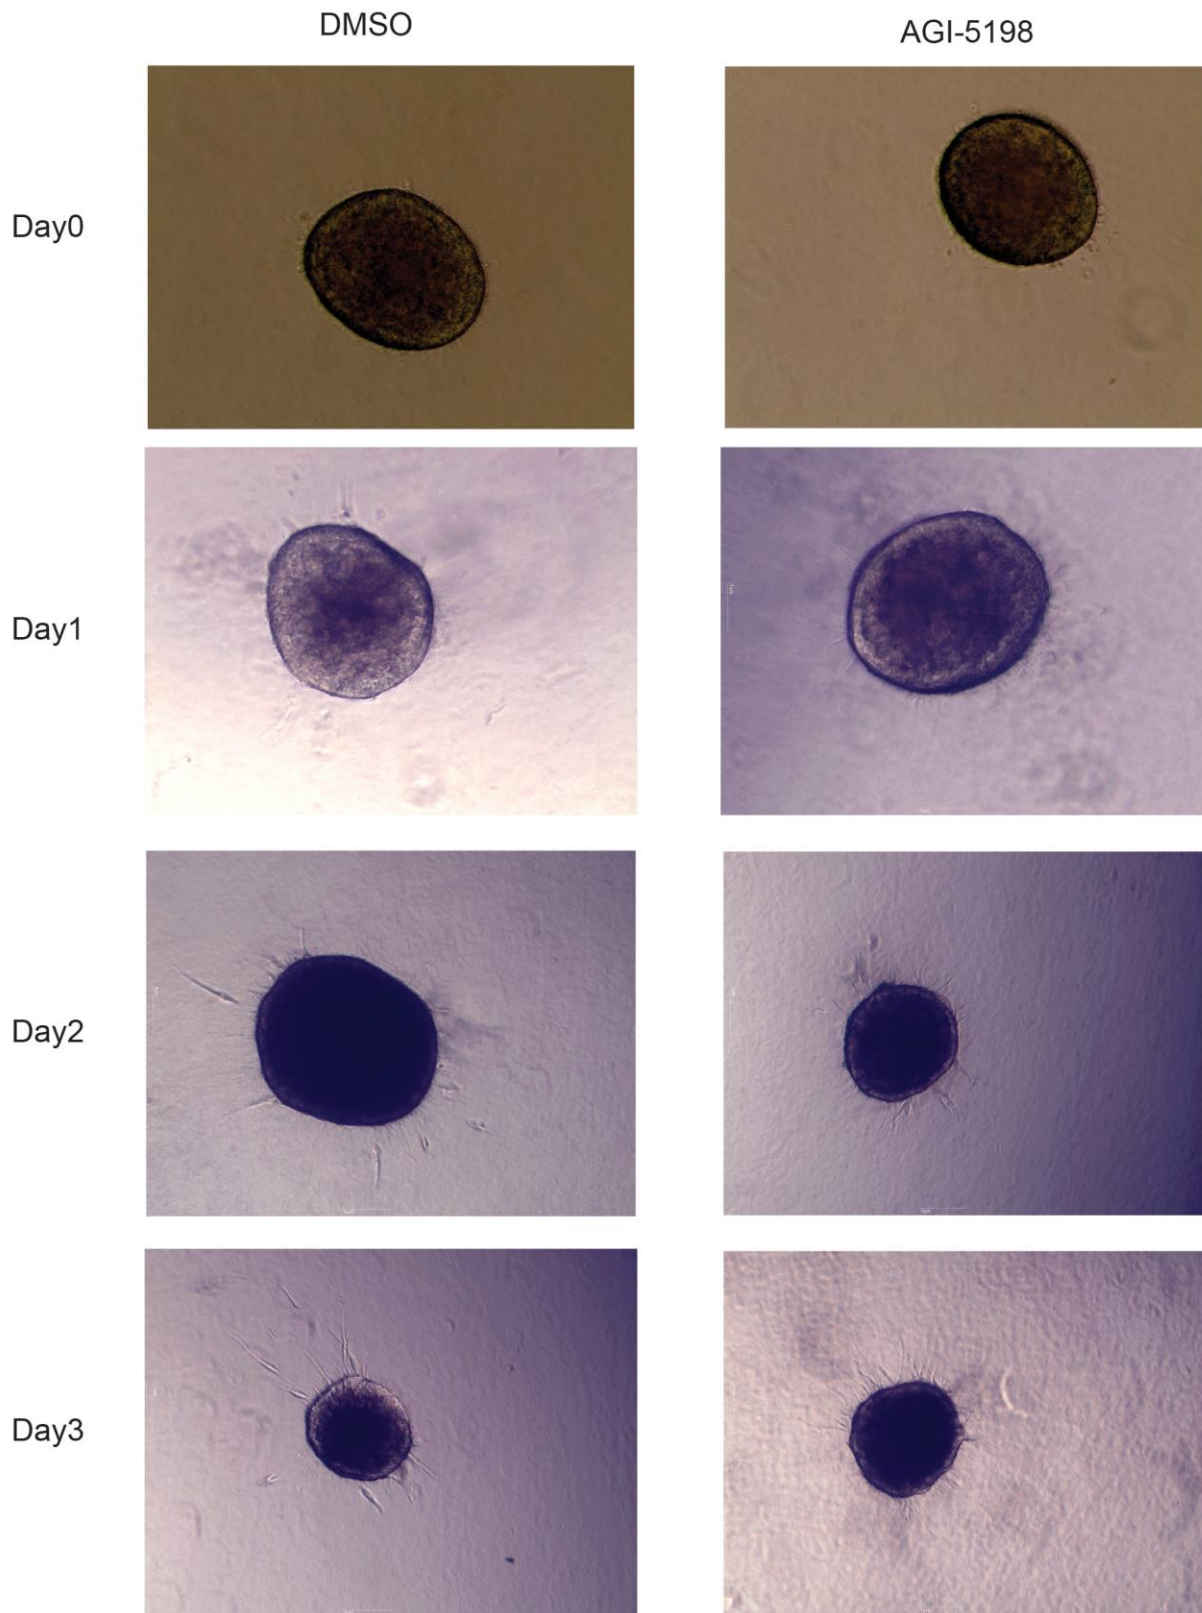

**Supplementary figure 2: Effects of AGI-5198 treatment on migration in a 3D assay.**

No differences in the ability to migrate in a 3D assay were observed between the IDH1/2 wildtype cell line CH2879, the mutant IDH1 cell lines JJ012 and HT1080 and the mutant IDH2 cell line SW1353. Furthermore, treatment with 10  $\mu$ M AGI-5198 did not affect the ability of all cell lines to migrate. Pictures were taken one hour, one day, two days and three days after injection of cells into the matrix.



# SW1353

DMSO

AGI-5198

Day0

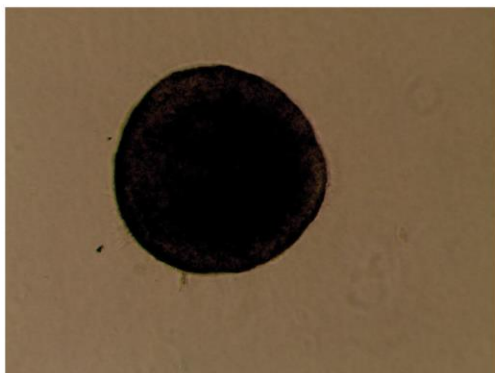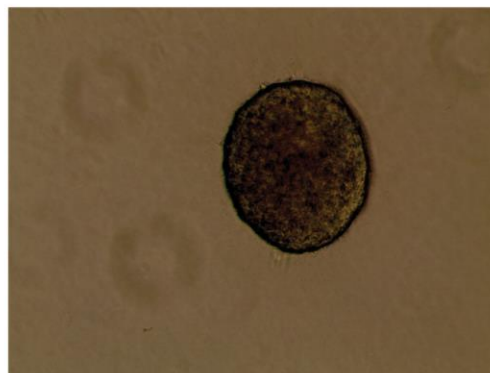

Day1

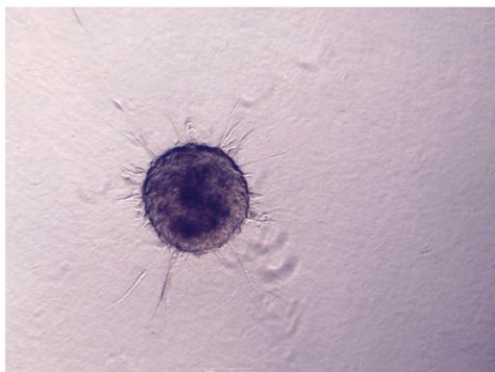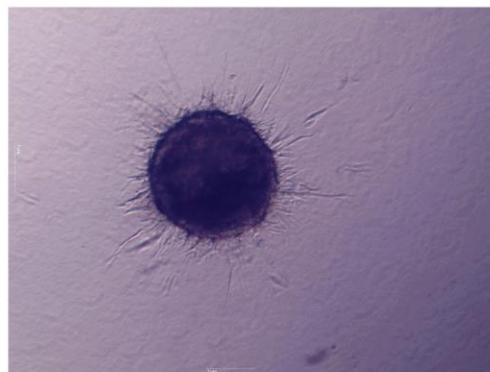

Day2

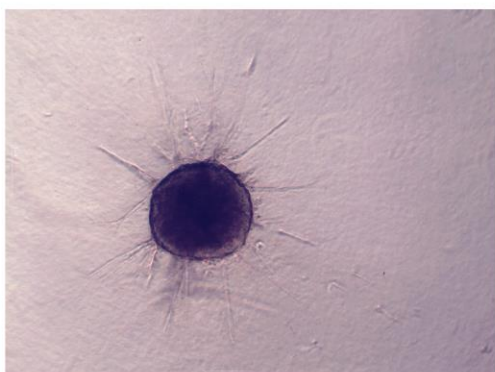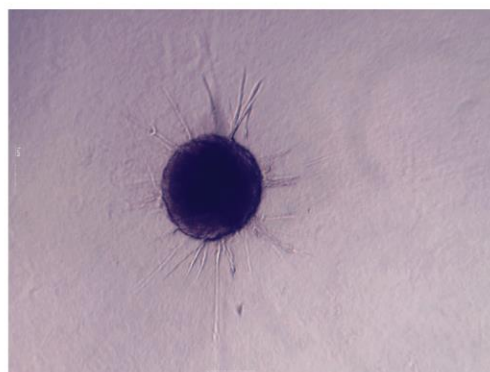

Day3

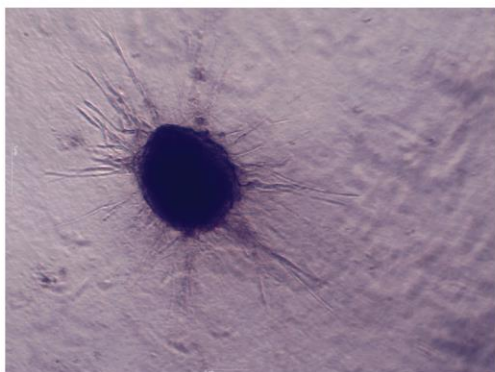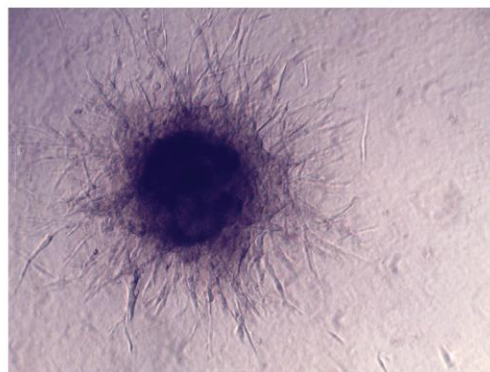

## Supplementary figure 2: Effects of AGI-5198 treatment on migration in a 3D assay.

No differences in the ability to migrate in a 3D assay were observed between the IDH1/2 wildtype cell line CH2879, the mutant IDH1 cell lines JJ012 and HT1080 and the mutant IDH2 cell line SW1353. Furthermore, treatment with 10  $\mu$ M AGI-5198 did not affect the ability of all cell lines to migrate. Pictures were taken one hour, one day, two days and three days after injection of cells into the matrix.

# HT1080

DMSO

AGI-5198

Day0

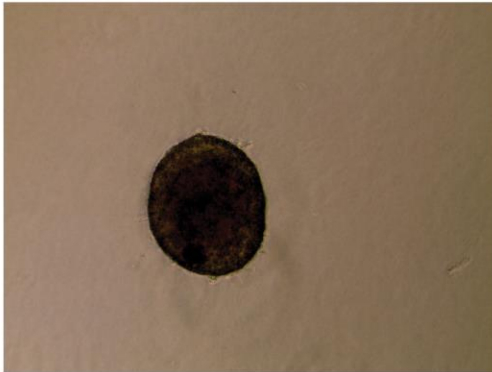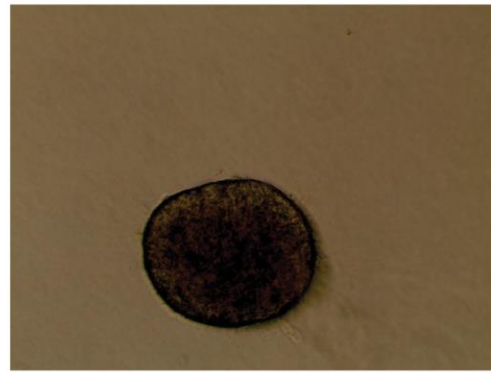

Day1

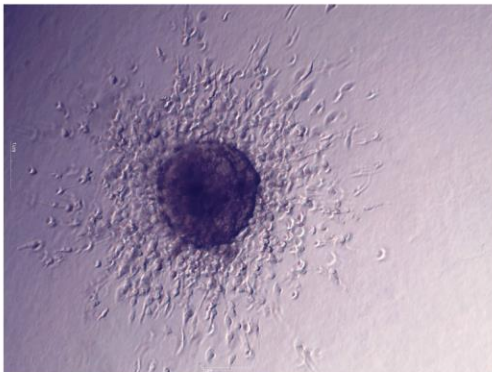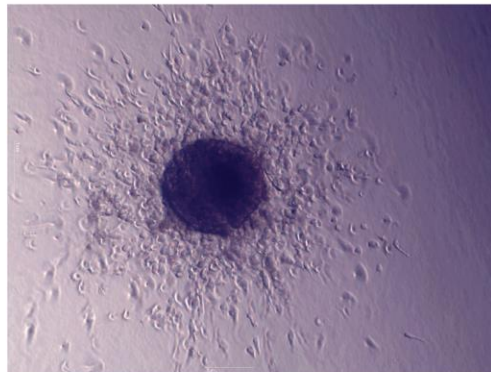

Day2

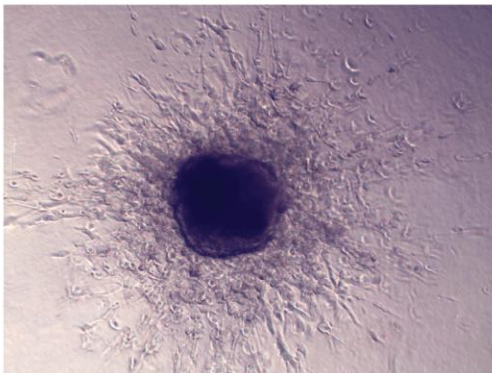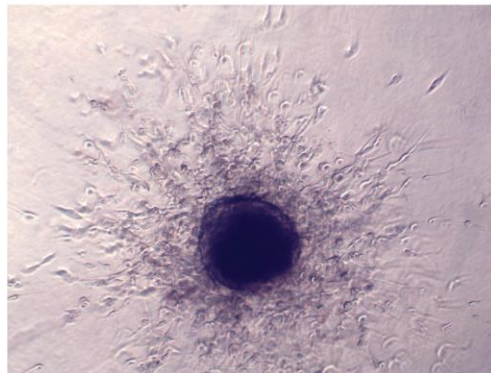

Day3

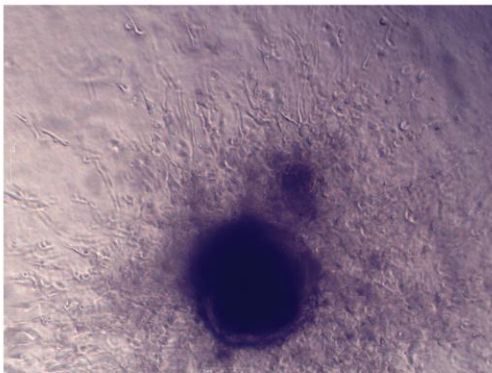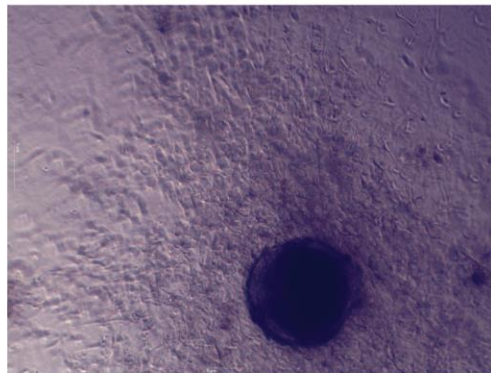

## Supplementary figure 2: Effects of AGI-5198 treatment on migration in a 3D assay.

No differences in the ability to migrate in a 3D assay were observed between the IDH1/2 wildtype cell line CH2879, the mutant IDH1 cell lines JJ012 and HT1080 and the mutant IDH2 cell line SW1353. Furthermore, treatment with 10  $\mu$ M AGI-5198 did not affect the ability of all cell lines to migrate. Pictures were taken one hour, one day, two days and three days after injection of cells into the matrix.

**Supplementary table 1: Primers used for Quantitative Real Time PCR**

| <b>Gene symbol</b> | <b>Gene name</b>                               | <b>Forward primer</b>      | <b>Reverse primer</b>     |
|--------------------|------------------------------------------------|----------------------------|---------------------------|
| <i>PPIA</i>        | CyclophilinA                                   | TCATCTGCACTGCCAAGACTG      | CATGCCTTCTTTCACTTTGCC     |
| <i>CPSF6</i>       | Cleavage and polyadenulation specific factor 6 | AAGATTGCCTTCATGGAATTGAG    | TCGTGATCTACTATGGTCCCTCTCT |
| <i>GPR108</i>      | G-protein coupled receptor 108                 | AGATGCCCTTTTCAAGCTCTAC     | GCCATGAGCCAGTGGATCTTG     |
| <i>IHH</i>         | Indian hedgehog homolog                        | CCAATTACAATCCAGACATCATCTTC | GATAGCCAGCGAGTTCAGGC      |
| <i>PTCH1</i>       | Patched homolog                                | CCACGACAAAGCCGACTACAT      | GCTGCAGATGGTCCTTACTTTTC   |
| <i>SMO</i>         | Smoothened homolog                             | AGCGCAGCTTCCGGG            | CAGTTCCAAACATGGCAAACAG    |
| <i>GLI1</i>        | Glioma-associated oncogene homolog             | TGCAGTAAAGCCTTCAGCAATG     | TTTTCGCAGCGAGCTAGGAT      |
| <i>GLI2</i>        | GLI-Kruppel family member GLI2                 | TTCTCCAACGCCTCGGAC         | GTGGACCGTTTTACATGCTT      |
| <i>GLUT1</i>       | Glucose transporter type 1                     | ATGAGAAGATGCCGATTTGG       | TTTTCTGAGTGCCTGCTGTG      |
| <i>BNIP3</i>       | BCL2/Adenovirus E1B 19 kDa interacting protein | ACCCTCAGCATGAGGAACAC       | AGCAGCAGAGATGGAAGGAA      |
| <i>EGLN3</i>       | Egl-9 family hypoxia inducible factor          | AGCTACATGGTGGGATCCTG       | ACTTCGTGTGGTTTCCTACG      |
| <i>ENO1</i>        | Enolase 1                                      | GATCCCTTTGACCAGGATGA       | CTGTGAGATCATCCCCACT       |
| <i>VEGF</i>        | Vascular endothelial growth factor             | TCTTCAAGCCATCCTGTGTG       | ATCTGCATGGTGATGTTGGA      |
| <i>COL1a1</i>      | Collagen type 1a1                              | AAGACGAAGACATCCCACCAAT     | GTCACAGATCACGTCATCGCA     |
| <i>COL2a1</i>      | Collagen type 2a1                              | GTCTGTGCTGGTGGTCTG         | CGAGGACCTTGAGCACCTT       |
| <i>COL1a2</i>      | Collagen type 1a2                              | GCTGGAAAAGATGGTCGCAC       | TAACCACCACCGCTTACACC      |
| <i>RUNX2</i>       | Runt-Related Transcription factor2             | CAGAACCACGGCCCTCCCT        | CCCAGTGCCCCGTGTGGAAG      |
| <i>BGLAP</i>       | Osteocalcin                                    | TGAGAGCCCTCACACTCCTC       | ACCTTTGCTGGACTCTGCAC      |
| <i>OPN</i>         | Osteopontin                                    | TTTTCGCAGACCTGACATCC       | GGCTGTCCCAATCAGAAGG       |
| <i>SPARC</i>       | osteonectin                                    | GTGCAGAGGAAACCGAAGAG       | TGTTTGCAGTGGTGGTTCTG      |
| <i>DIO2</i>        | Deiodinase iodothyronine type 2                | TTCCAGTGTGGTGCATGTCTCTC    | AGTCAAGAAGGTGGCATGTGG     |
